# Supplementary material
Source: publisher site journal article supplement (https://www.dovepress.com/article/401566)
Supplement: Supplementary file 1 [file get_supplementary_file.php]

## HDC promoter

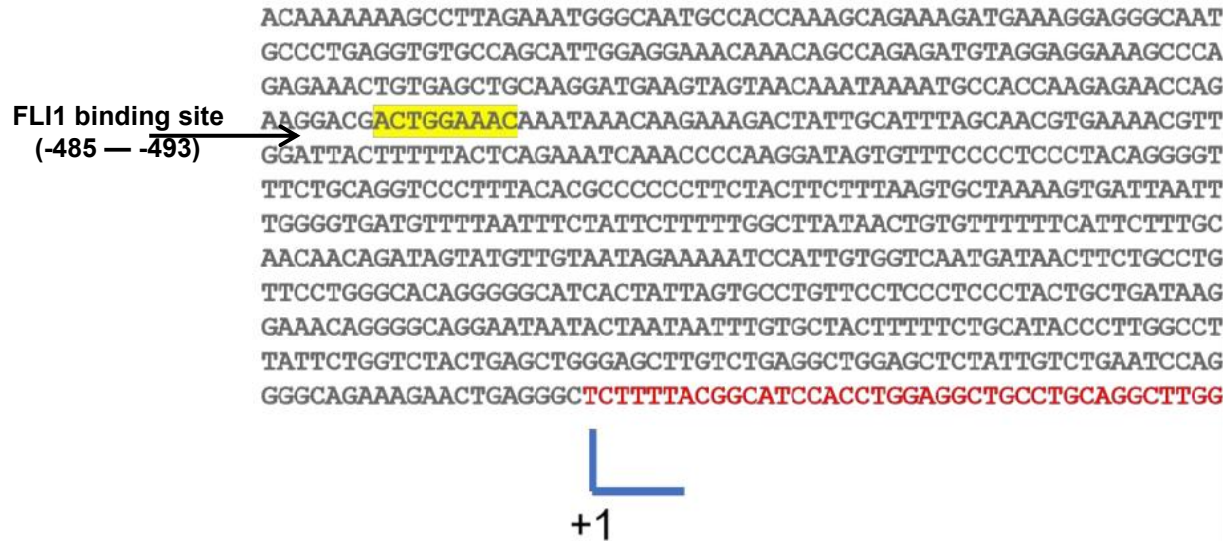

**Supplemental figure 1.** The promoter of the HDC gene with FLI1 binding sites. The transcription start site was marked as +1 and red. FLI1 binding site was highlighted in yellow.

**A**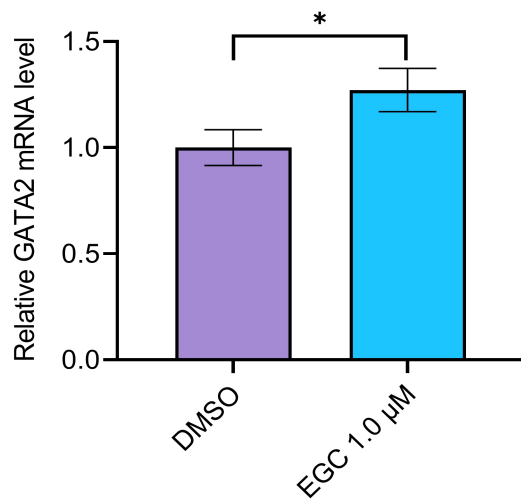**B**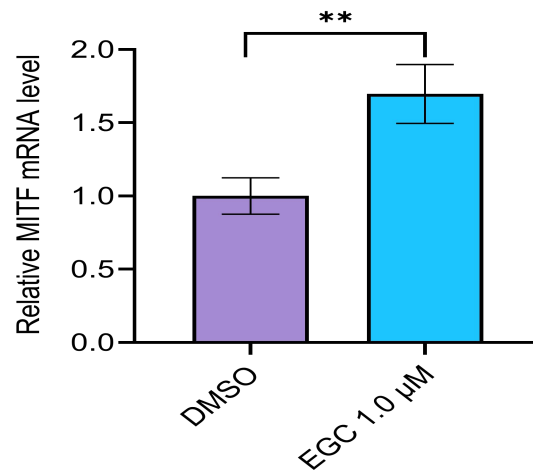**C**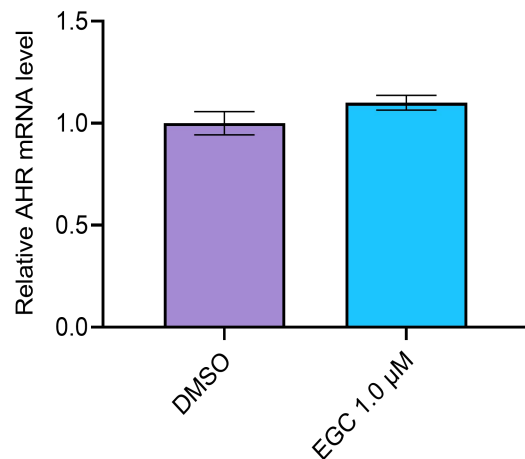**D**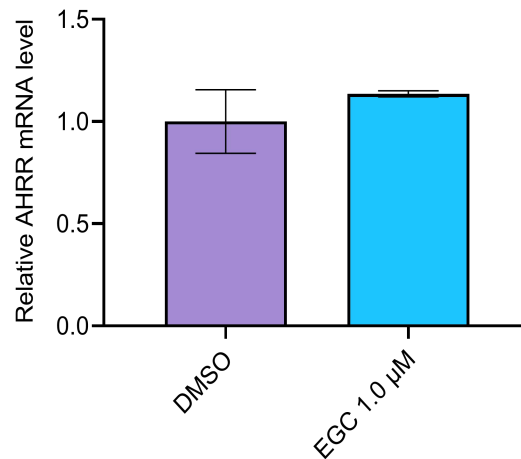**E**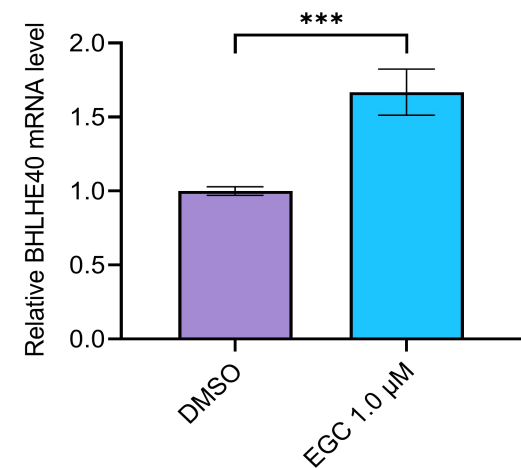

**Supplemental figure 2. EGC controls asthma response genes.** RT-qPCR analysis of HEL cells treated with EGC (1  $\mu$ M) at 24 h for expression of the indicated genes.

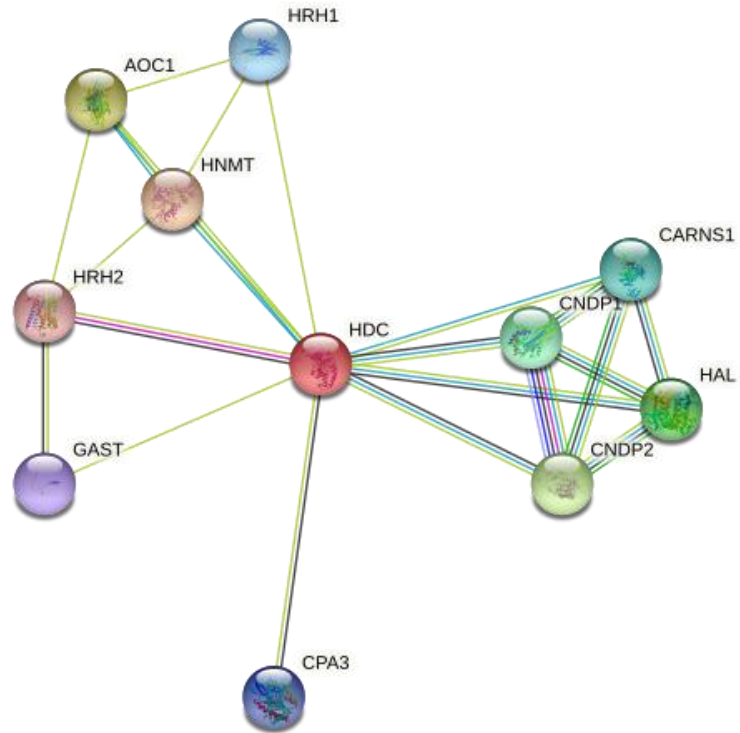

**Supplemental figure 3:** Network map of interacting genes with HDC, using STRING database.

A

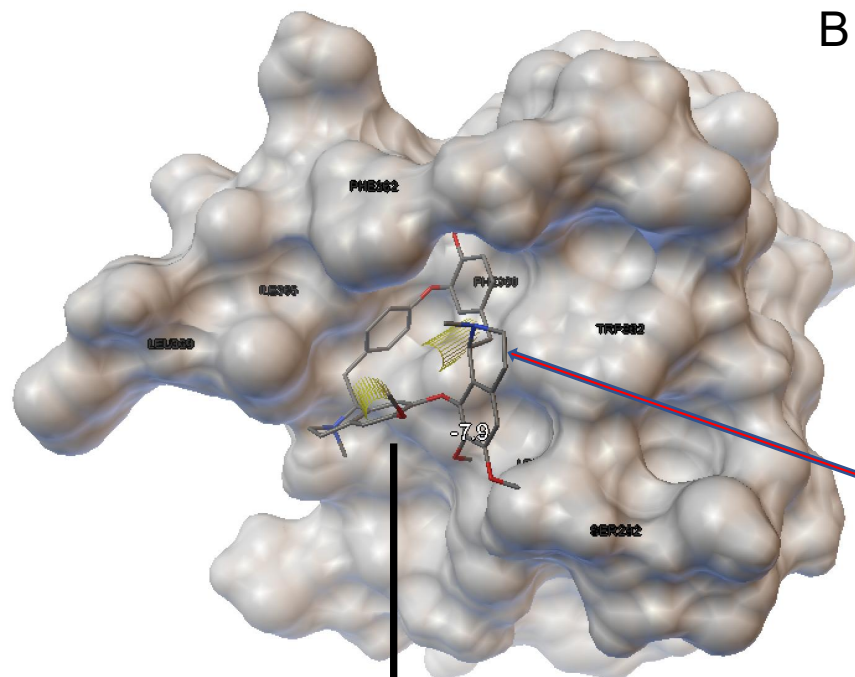

B

| Interacting molecule | compound    | Binding energy (KJ/Mol) |
|----------------------|-------------|-------------------------|
| FLI1                 | Tetrandrine | -7.9                    |

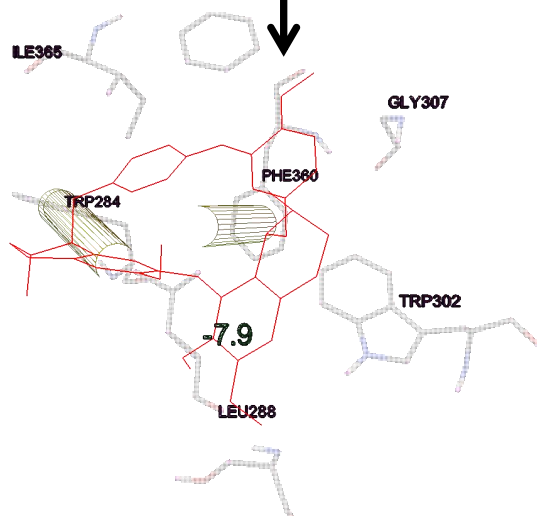

ETS domain of FLI1

**Supplemental figure 4: Tetrandrine binds to FLI1.** (A) Three-dimensional view of the predicted interaction of Tetrandrine with FLI1. The ETS DNA binding domain of FLI1 is marked by red arrow. (B) Properties of tetrandrine binding affinity to the FLI-1 DNA binding site.

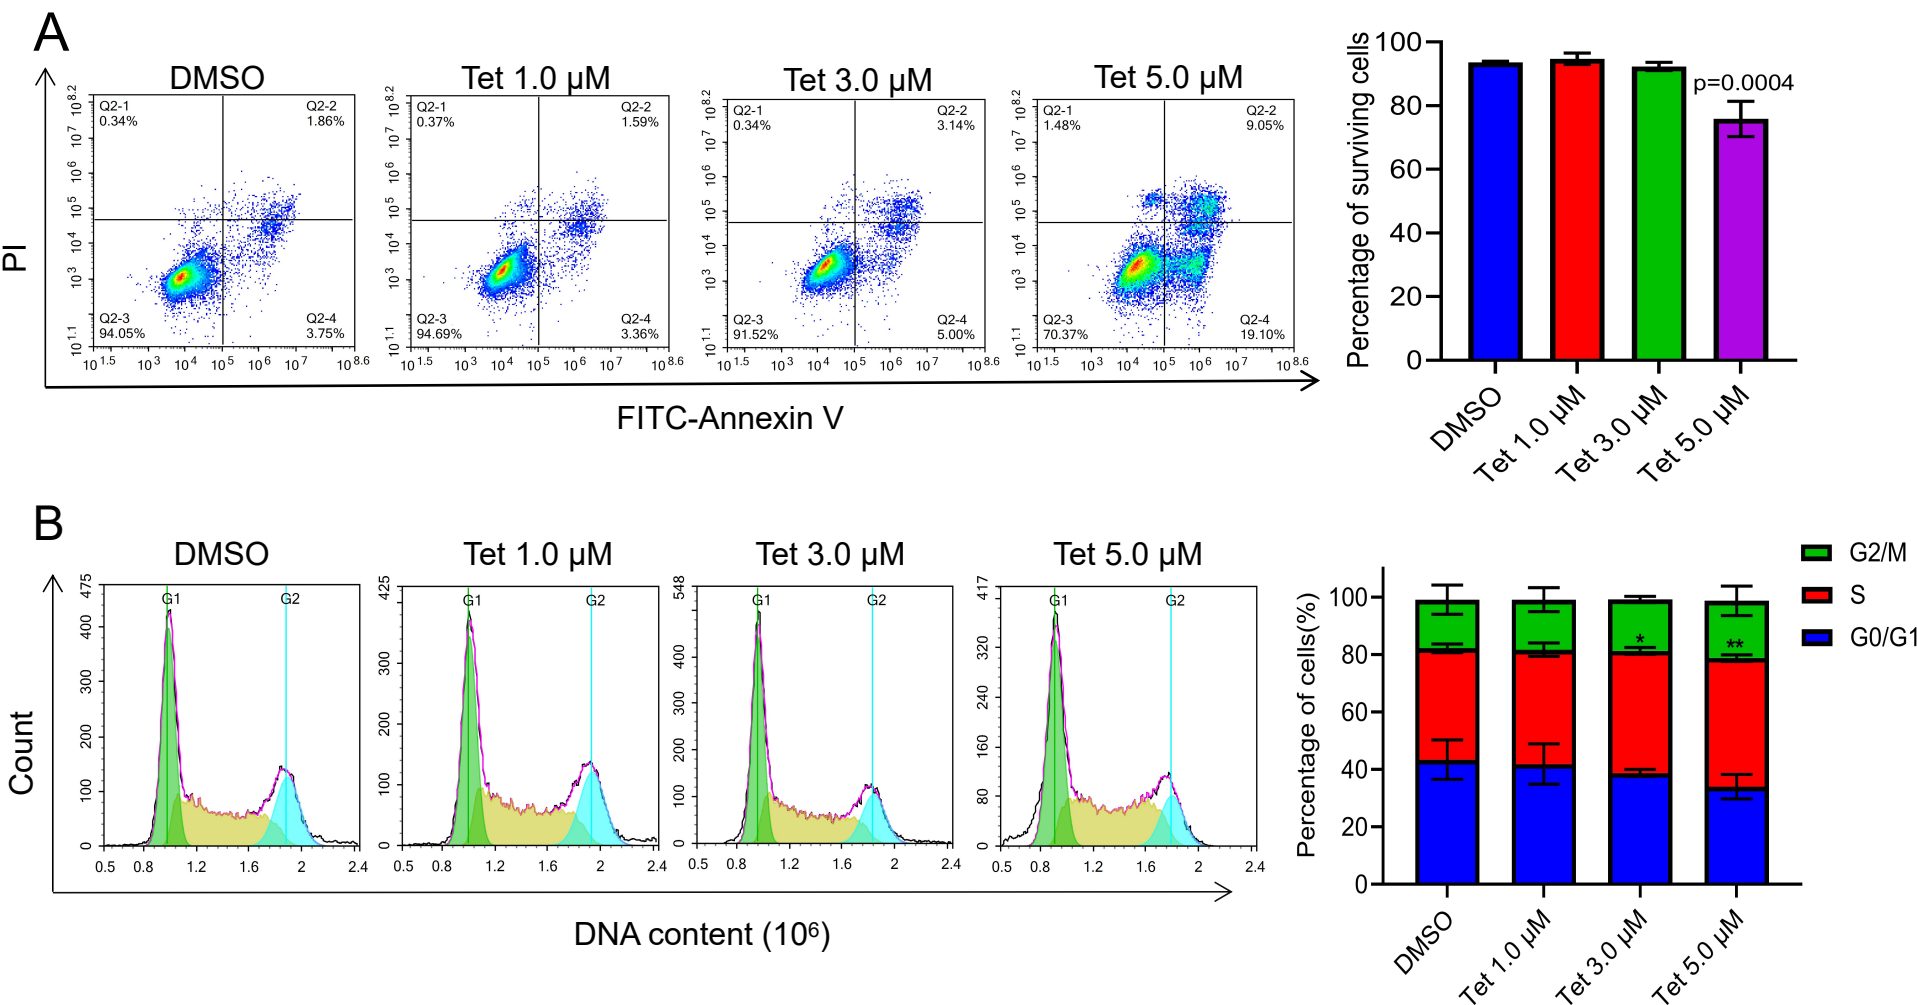

**Supplemental figure 5. Tetrandrine induces apoptosis and cell cycle arrest of leukemic cells.** (A,B) HEL cells treated with the indicated concentration of tetrandrine for 24 h and used for apoptosis (A) and cell cycle (B) analysis. Average of three experiments with statistics shown in the right panel.
